# Supplementary material for: Proteoform-Specific Insights into Cellular Proteome Regulation
Source: PubMed Central journal article supplement (PMC5054351; doi:10.1074/mcp.o116.058438), 2016-07-22
Supplement: 10.1074_O116.058438_mcp.O116.058438-1.pdf [file 10.1074_O116.058438_mcp.O116.058438-1.pdf]

**Supplemental Table 1.** The number of pI values represented in the boxplots presented in Supplemental Figure 1B for each fraction for the ten protein OGE separations.

|                     |     | Sample |        |        |        |        |        |        |        |        |        |    |    |
|---------------------|-----|--------|--------|--------|--------|--------|--------|--------|--------|--------|--------|----|----|
|                     |     | hRSV 1 | hRSV 2 | hRSV 3 | hRSV 4 | hRSV 5 | Mock 1 | Mock 2 | Mock 3 | Mock 4 | Mock 5 |    |    |
| IEF Fraction Number | F1  | 0      | 0      | 6      | 0      | 0      | 0      | 0      | 0      | 0      | 0      | 0  | 0  |
|                     | F2  | 1      | 0      | 1      | 4      | 2      | 2      | 0      | 1      | 0      | 0      | 0  | 0  |
|                     | F3  | 15     | 12     | 16     | 15     | 16     | 21     | 5      | 13     | 9      | 8      | 8  | 8  |
|                     | F4  | 27     | 18     | 33     | 25     | 32     | 32     | 21     | 39     | 32     | 28     | 28 | 28 |
|                     | F5  | 30     | 33     | 47     | 29     | 32     | 44     | 26     | 44     | 26     | 17     | 17 | 17 |
|                     | F6  | 26     | 35     | 31     | 23     | 27     | 31     | 32     | 36     | 32     | 34     | 34 | 34 |
|                     | F7  | 25     | 31     | 33     | 29     | 31     | 31     | 28     | 30     | 27     | 14     | 14 | 14 |
|                     | F8  | 25     | 32     | 32     | 46     | 46     | 29     | 31     | 31     | 34     | 44     | 44 | 44 |
|                     | F9  | 34     | 35     | 33     | 41     | 12     | 29     | 32     | 30     | 35     | 36     | 36 | 36 |
|                     | F10 | 33     | 38     | 41     | 46     | 51     | 35     | 35     | 42     | 42     | 47     | 47 | 47 |
|                     | F11 | 16     | 36     | 24     | 29     | 38     | 27     | 35     | 32     | 35     | 34     | 34 | 34 |
|                     | F12 | 7      | 9      | 42     | 26     | 21     | 39     | 38     | 38     | 37     | 40     | 40 | 40 |
|                     | F13 | 5      | 46     | 23     | 45     | 54     | 37     | 40     | 43     | 37     | 29     | 29 | 29 |
|                     | F14 | 20     | 35     | 28     | 26     | 30     | 13     | 34     | 35     | 32     | 31     | 31 | 31 |
|                     | F15 | 4      | 43     | 28     | 42     | 42     | 39     | 54     | 31     | 37     | 42     | 42 | 42 |
|                     | F16 | 27     | 50     | 32     | 24     | 19     | 21     | 41     | 36     | 34     | 37     | 37 | 37 |
|                     | F17 | 4      | 37     | 27     | 16     | 19     | 17     | 15     | 29     | 38     | 36     | 36 | 36 |
|                     | F18 | 13     | 6      | 18     | 29     | 29     | 23     | 19     | 36     | 20     | 19     | 19 | 19 |
|                     | F19 | 0      | 2      | 18     | 30     | 33     | 26     | 25     | 2      | 39     | 26     | 26 | 26 |
|                     | F20 | 10     | 1      | 21     | 45     | 47     | 16     | 19     | 3      | 37     | 43     | 43 | 43 |
|                     | F21 | 5      | 34     | 7      | 41     | 25     | 3      | 9      | 7      | 19     | 29     | 29 | 29 |
|                     | F22 | 22     | 9      | 0      | 2      | 21     | 3      | 1      | 15     | 13     | 27     | 27 | 27 |
|                     | F23 | 7      | 0      | 0      | 0      | 0      | 0      | 0      | 0      | 17     | 11     | 11 | 11 |
|                     | F24 | 0      | 0      | 1      | 0      | 0      | 0      | 0      | 0      | 1      | 1      | 1  | 1  |
